# Supplementary material for: An adjustable acoustic metamaterial cell using a magnetic membrane for tuneable resonance
Source: Research Square preprint supplement (doi:10.21203/rs.3.rs-3981740/v1), 2024-03-13

# An adjustable acoustic metamaterial cell using a magnetic membrane for tuneable resonance

Alicia Gardiner<sup>1,2,\*</sup>, Roger Domingo-Roca<sup>2</sup>, James Windmill<sup>2</sup>, and Andrew Feeney<sup>1</sup>

<sup>1</sup>Centre for Medical and Industrial Ultrasonics, James Watt School of Engineering, University of Glasgow, Glasgow, G12 8QQ, UK

<sup>2</sup>Centre for Ultrasonic Engineering, Department of Electronic & Electrical Engineering, University of Strathclyde, Glasgow, G1 1XW, UK

\*a.gardiner.1@research.gla.ac.uk

## ABSTRACT

One of the most exciting challenges in acoustic metamaterial (AMM) research is to incorporate tuneability, for example where the resonance of the AMM can be actively adjusted, whilst also ensuring ease of manufacture. Many of the challenges in realising physical AMM prototypes, such as ensuring small feature sizes, introducing specific material characteristics, and enabling scale-up fabrication, remain significant barriers in the design of AMMs in general. As such, the dynamic control of device response is an ongoing obstacle in the field of AMMs. One option for practical AMM implementation in the future is to mitigate some of these barriers by enabling adaptable resonant properties to tailor device response. To this end, this research demonstrates the design, fabrication, and characterisation of an adjustable magnetic AMM cell using stereolithography with a bespoke superparamagnetic resin. To underpin the experimental approach, a mathematical model able to predict the behaviour of the adjustable AMM is developed and implemented, for which the mechanical properties of the AMM membrane were experimentally measured and used to define the model. This research demonstrates a 3D-printable magnetic AMM cell able to perform sub-100 Hz acoustic resonant tuning. The developed superparamagnetic formulation recorded a magnetisation of saturation of 2.4 emu/g, coercivity of 5 mT, and a Young's modulus of 17.89 MPa. The device is thus ultra-subwavelength ( $\lambda/77.5$ ) and displays magnetically-actuated resonant tuneability from 88.73 Hz – 86.63 Hz with a consistent 12 dB increase in resonance.

**Supplementary Table S1 - Definitions**

| Definitions and Values used in the Mathematical Model                      |                |                                    |          |
|----------------------------------------------------------------------------|----------------|------------------------------------|----------|
| Variable                                                                   | Symbol         | Value                              | Units    |
| Density of Air                                                             | $\rho_{air}$   | 1.293 <sup>1</sup>                 | $Kg/m^3$ |
| Speed of Sound in Air                                                      | $c_{air}$      | 344 <sup>2</sup>                   | $m/s$    |
| Height of Helmholtz Resonator Neck                                         | $h_{neck}$     | $2.5 \times 10^{-3}$               | $m$      |
| Area of Neck Opening                                                       | $S_{neck}$     | $3.1416 \times 10^{-4}$            | $m$      |
| Volume of HR Cavity                                                        | $V_{cavity}$   | $1.3273 \times 10^{-5}$            | $m^3$    |
| Density of Membrane                                                        | $\rho_{mem}$   | 1185.23                            | $Kg/m^3$ |
| Thickness of Membrane                                                      | $h$            | $2.6 \times 10^{-4}$               | $m$      |
| Nth solution to the Bessel function of the 1st kind, 0th order ( $n = 1$ ) | $\mu_n$        | 2.405 <sup>3</sup>                 | -        |
| Membrane Radius                                                            | $a$            | $13 \times 10^{-3}$                | $m$      |
| Fundamental/Natural Frequency of Membrane                                  | $\omega_{mem}$ | -                                  | $Rads/s$ |
| Damping Ratio of Membrane                                                  | $\zeta_n$      | 0.005                              | -        |
| Viscous Damping Coefficient                                                | $c_d$          | -                                  | $Ns/m$   |
| Volume Velocity of HR air at Neck                                          | $U_1$          | -                                  | $m^3/s$  |
| Volume Velocity of air around Membrane for 1st mode                        | $x_2$          | -                                  | $m^3/s$  |
| Normal Displacement of Membrane                                            | $z$            | -                                  | $m$      |
| Time Elapsed                                                               | $t$            | -                                  | $s$      |
| Force of Acoustic Excitation                                               | $F_1$          | 0                                  | $N$      |
| Frequency of Excitation                                                    | $\omega_F$     | -                                  | $Rads/s$ |
| Acoustic Fundamental Resonant Frequency of Device                          | $\omega$       | -                                  | $Rads/s$ |
| Flexural Stiffness of membrane                                             | $D$            | -                                  | $Nm$     |
| Tension per unit Length                                                    | $T$            | -                                  | $N/m$    |
| Mechanical Pre-stress                                                      | $T_1$          | -                                  | $N/m$    |
| Magnetic Pre-stress                                                        | $T_2$          | -                                  | $N/m$    |
| Applied Force to Membrane                                                  | $F_2$          | -                                  | $N$      |
| Young's Modulus of Membrane                                                | $E$            | $17.89 \times 10^6$                | $N/m^2$  |
| Poisson's Ratio of Membrane                                                | $\nu$          | 0.35                               | -        |
| Magnetisation of Saturation per unit Volume                                | $M$            | $2.8446 \times 10^3$               | $A/m^2$  |
| Applied Magnetic Field Strength                                            | $H$            | -                                  | $A/m$    |
| Vacuum Permeability                                                        | $\mu_0$        | $4\pi \times 10^{-7}$ <sup>4</sup> | $N/A^2$  |
| Magnetic body Force on Membrane (Normal force per unit area)               | $P_0$          | -                                  | $N/m^2$  |

## References

1. N.A.S.A. Earth science data systems - “air mass/density” (2023). <https://www.earthdata.nasa.gov/topics/atmosphere/atmospheric-pressure/air-mass-density> [Accessed on (07/12/2023)].
2. Truax, B. Speed of sound (2023). [https://www.sfu.ca/sonic-studio-webdav/handbook/Speed\\_\\_Of\\_Sound.html](https://www.sfu.ca/sonic-studio-webdav/handbook/Speed__Of_Sound.html) [Accessed on (07/12/2023)].
3. Leissa, A. Membranes. In Braun, S. (ed.) *Encyclopedia of Vibration*, 762–770, DOI: <https://doi.org/10.1006/rwvb.2001.0132> (Elsevier, Oxford, 2001).
4. Goldfarb, R. B. The permeability of vacuum and the revised international system of units. *IEEE Magn. Lett.* **8**, 1–3, DOI: [10.1109/LMAG.2017.2777782](https://doi.org/10.1109/LMAG.2017.2777782) (2017).

## Supplementary Table S2 - Magnetic Sample Specifications

| Custom Resin Samples (100-50nm Fe <sub>3</sub> O <sub>4</sub> , 3.5%wt) |                      |                  |                 |
|-------------------------------------------------------------------------|----------------------|------------------|-----------------|
| Poling Regime                                                           | Density ( $Kg/m^3$ ) | Mass Capsule (g) | Mass Sample (g) |
| None                                                                    | 1185.23              | 0.041            | 0.023           |
| 150°C, 2hrs                                                             | 1185.23              | 0.041            | 0.017           |
| 300°C, 2hrs                                                             | 1185.23              | 0.041            | 0.023           |

## Supplementary Table S3 - Measured magnetic field from each array of magnets tested in this experiment.

| No. Magnets                 | 0 | 1     | 2   | 3     | 4     | 5   | 6     |
|-----------------------------|---|-------|-----|-------|-------|-----|-------|
| Maximum Magnetic Field (mT) | 0 | 160   | 263 | 321   | 356   | 399 | 422   |
| Minimum Magnetic Field (mT) | 0 | 85    | 151 | 240   | 273   | 301 | 363   |
| Average Magnetic Field (mT) | 0 | 122.5 | 207 | 280.5 | 314.5 | 350 | 392.5 |

## Supplementary Figure S1 - Clamped membrane undergoing measurements to capture the 1st resonant mode in Polytec's MSA-100-3D Micro System Analyzer.

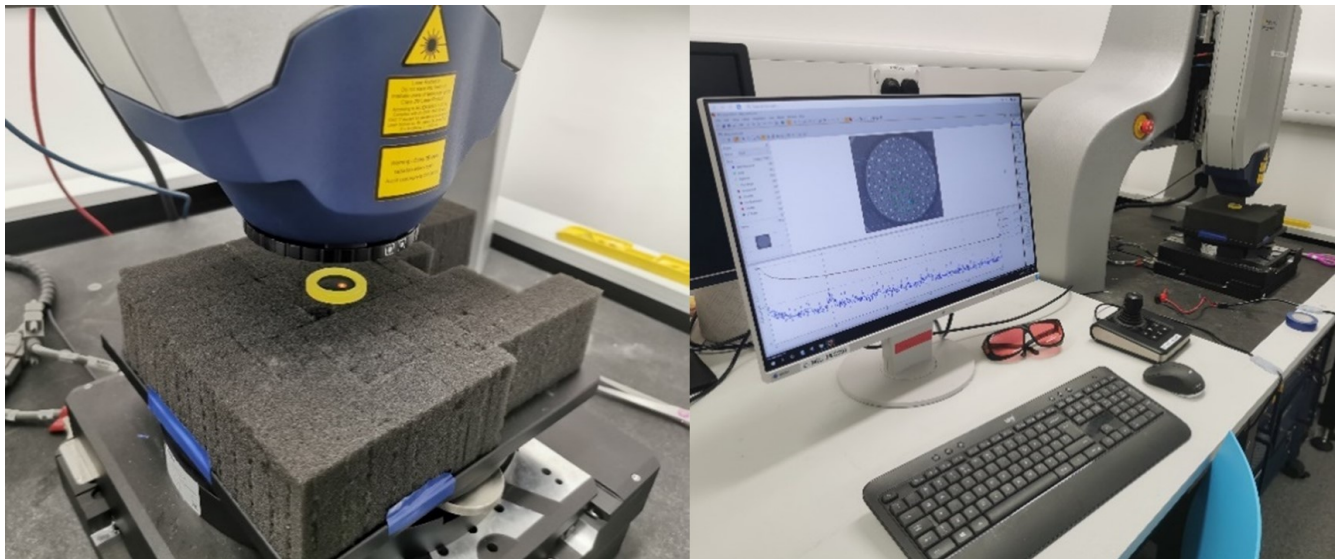

Supplement: Supplementary file 1 [file 77f3dc71dc55f8278e999b48.pdf]
